# Supplementary material for: Copper(ii) coordination compounds based on bis-hydrazones of 2,6-diacetylpyridine: synthesis, structure, and cytotoxic activity
Source: Royal Society of Chemistry journal article supplement (doi:10.1039/d3dt03750a), 2024-01-01
Supplement: d3dt03750a1.pdf [file d3dt03750a1.pdf]

**COPPER(II) COORDINATION COMPOUNDS BASED ON  
BIS-HYDRAZONES OF 2,6-DIACETILPYRIDINE: SYNTHESIS, STRUCTURE AND  
CYTOTOXIC ACTIVITY**

Anna A. Kapustina<sup>a</sup>, Yulia P. Tupolova<sup>a\*</sup>, Leonid D. Popov<sup>a</sup>, Valery G. Vlasenko<sup>b</sup>, Konstantin B. Gishko<sup>a</sup>, Alexandra G. Berejnaya<sup>a</sup>, Aleksandr A. Shcherbatykh<sup>a</sup>, Yuliya A. Golubeva<sup>c</sup>, Lyubov S. Klyushova<sup>d</sup>, Elizaveta V. Lider<sup>c</sup>, Vladimir A. Lazarenko<sup>c</sup>, Oleg P. Demidov<sup>f</sup>, Pavel A. Knyazev<sup>j</sup>, Stanislav S. Bachurin<sup>h</sup>, Vladimir B. Nalbandyan<sup>a</sup>, Igor N. Shcherbakov<sup>a</sup>

<sup>a</sup>Department of Chemistry, Southern Federal University, Rostov-on-Don, 344090, Russia

<sup>b</sup>Scientific Research Institute of Physics, Southern Federal University, Rostov-on-Don, 344090, Russia

<sup>c</sup>Nikolaev Institute of Inorganic Chemistry SB RAS, 3, Acad. Lavrentiev Ave., 630090, Novosibirsk, Russia

<sup>d</sup>Institute of Molecular Biology and Biophysics, Federal Research Center of Fundamental and Translational Medicine (IMBB FRC FTM), 2/12, Timakova str., 630060, Novosibirsk, Russia

<sup>e</sup>National Research Center "Kurchatov Institute", Acad. Kurchatov Sq., 1, Moscow, 123182, Russia

<sup>f</sup>Department of Organic Chemistry, North Caucasus Federal University, Stavropol, 355017, Russia

<sup>j</sup>Institute of Physical and Organic Chemistry, Southern Federal University, 194/2 Stachki st., Rostov-on-Don, 344090, Russian Federation

<sup>h</sup>Department of General and Clinical Biochemistry N2, Rostov State Medical University, Rostov-on-Don, 344022, Russia

\*corresponding author: E-mail address: [yptupolova@sfnu.ru](mailto:yptupolova@sfnu.ru) (Yu.P. Tupolova), Tel./fax: +7 863 2975148.

**Table S1.** Experimental and calculated (for isomer **a**) IR spectral data of *bis*(4,6-dimethylpyrimidine--2-hydrazone)-2,6-diacetylpyridine (**H<sub>2</sub>L<sup>1</sup>**)

| Assignment                   | Calculated                  |                                 | Experimental                                |
|------------------------------|-----------------------------|---------------------------------|---------------------------------------------|
|                              | Frequency, cm <sup>-1</sup> | Intensity, kM mol <sup>-1</sup> | Frequency, cm <sup>-1</sup><br>(intensity*) |
| v(NH)                        | 3426                        | 15                              | 3413(m)                                     |
| v(CH)                        | 3088                        | 19                              | 3078(w)                                     |
|                              | 3064                        | 4                               |                                             |
| v(CH <sub>3</sub> )          | 3017                        | 49                              | 2953(m)                                     |
|                              | 2995                        | 18                              |                                             |
|                              | 2951                        | 44                              |                                             |
| v(C=N) <sub>azom</sub>       | 1597                        | 146                             | 1592(s)                                     |
| Py + Pyrimid. rings          | 1573                        | 347                             | 1567(s)                                     |
|                              | 1556                        | 81                              | 1556(s)                                     |
|                              | 1546                        | 1469                            | 1538(m)                                     |
| v(NH-C) + δ(NH)              | 1526                        | 114                             | 1519 (m)                                    |
|                              | 1521                        | 670                             |                                             |
| δ(CH <sub>3</sub> ) + δ(CH)  | 1460                        | 154                             | 1462(s)<br>1454(s)                          |
|                              | 1453                        | 180                             |                                             |
|                              | 1447                        | 184                             |                                             |
|                              | 1436                        | 306                             |                                             |
| v(NH-C=N) <sub>pyrimid</sub> | 1331                        | 455                             | 1344(m)                                     |
| Pyrimid. rings               | 1323                        | 404                             | 1302(m)                                     |
| Py ring                      | 1281                        | 394                             | 1261(w)                                     |
| v(N-NH-) <sub>hydrazon</sub> | 1175                        | 711                             | 1179(s)                                     |

\*Intensities are denoted as follows: vs-very strong, s-strong, m-medium, w-weak.

**Table S2.** Experimental and calculated (for isomer **a**) IR spectral data of *bis*(benzimidazoline-2-hydrazone)-2,6-diacetylpyridine (**H<sub>2</sub>L<sup>2</sup>**)

| Assignment                                         | Calculated                  |                                 | Experimental                                |
|----------------------------------------------------|-----------------------------|---------------------------------|---------------------------------------------|
|                                                    | Frequency, cm <sup>-1</sup> | Intensity, kM mol <sup>-1</sup> | Frequency, cm <sup>-1</sup><br>(intensity*) |
| $\nu(\text{NH})_{\text{benzim}}$                   | 3556                        | 70                              | 3332(m)                                     |
| $\nu(\text{NH})_{\text{hydrazon}}$                 | 3445                        | 37                              | 3268(m)                                     |
| $\nu(\text{CH})$                                   | 3087                        | 67                              | 3057(w)                                     |
|                                                    | 3078                        | 65                              |                                             |
| $\nu(\text{CH}_3)$                                 | 2951                        | 38                              | 2969(w)                                     |
|                                                    | 2912                        | 32                              | 2937(w)                                     |
| $\nu(\text{C}=\text{N})_{\text{benzim}}$           | 1630                        | 966                             | 1697(s)                                     |
| $\nu(\text{C}=\text{N})_{\text{azom}}$             | 1592                        | 499                             | 1627(s)                                     |
| Py + Benzimid. rings                               | 1579                        | 39                              | 1608(s)                                     |
|                                                    | 1563                        | 396                             | 1577(m)                                     |
|                                                    | 1553                        | 935                             | 1542(s)                                     |
| $\nu(\text{C}-\text{NH})_{\text{benzim}}$          | 1485                        | 80                              | 1481 (m)                                    |
| $\delta(\text{CH}_3) + \delta(\text{CH})$          | 1455                        | 166                             | 1462(s)                                     |
|                                                    | 1437                        | 196                             |                                             |
|                                                    | 1423                        | 530                             |                                             |
| $\nu(\text{NH}-\text{C}=\text{N})_{\text{benzim}}$ | 1394                        | 50                              | 1413(w)                                     |
| Py ring                                            | 1315                        | 36                              | 1312(s)                                     |
|                                                    | 1283                        | 185                             |                                             |
| Benzimid. rings                                    | 1245                        | 51                              | 1255(w)                                     |
| $\nu(\text{N}-\text{NH}-)_{\text{hydrazon}}$       | 1186                        | 468                             | 1205(s)                                     |
|                                                    | 1158                        | 727                             | 1185(m)                                     |

\*Intensities are denoted as follows: vs-very strong, s-strong, m-medium, w-weak.

**Table S3.** Experimental and calculated (for isomer **a**) IR spectral data of *bis*(phthalazine-1-hydrazone)-2,6-diacetylpyridine (**H<sub>2</sub>L<sup>3</sup>**)

| Assignment                                | Calculated                  |                                 | Experimental                                |
|-------------------------------------------|-----------------------------|---------------------------------|---------------------------------------------|
|                                           | Frequency, cm <sup>-1</sup> | Intensity, kM mol <sup>-1</sup> | Frequency, cm <sup>-1</sup><br>(intensity*) |
| $\nu(\text{NH})_{\text{phatal}}$          | 3498                        | 53                              | 3324(m)                                     |
| $\nu(\text{CH})$                          | 3084                        | 67                              | 3052(w)                                     |
|                                           | 3071                        | 32                              |                                             |
| $\nu(\text{CH}_3)$                        | 3065                        | 17                              | 2924(w)                                     |
|                                           | 2990                        | 27                              |                                             |
|                                           | 2945                        | 17                              |                                             |
| $\nu(\text{C}=\text{N})_{\text{azom}}$    | 1603                        | 1155                            | 1604(s)                                     |
| $\nu(\text{C}=\text{N})_{\text{phatal}}$  | 1589                        | 87                              | 1589(s)                                     |
| Py + Phtal. rings                         | 1566                        | 41                              | 1560(m)                                     |
|                                           | 1552                        | 458                             | 1531(s)                                     |
|                                           | 1523                        | 680                             |                                             |
| $\delta(\text{CH}_3) + \delta(\text{CH})$ | 1454                        | 44                              | 1477(m)                                     |
|                                           | 1448                        | 29                              |                                             |
|                                           | 1439                        | 253                             |                                             |
|                                           | 1419                        | 315                             |                                             |
| $\nu(\text{N}=\text{NH})_{\text{phatal}}$ | 1331                        | 121                             | 1370(m)                                     |
| Phtal. rings                              | 1329                        | 222                             | 1346(s)                                     |
| Py ring                                   | 1280                        | 162                             | 1293(m)                                     |
| $\nu(-\text{N}=\text{N}-)$                | 1089                        | 164                             | 1075(s)                                     |
|                                           | 1033                        | 189                             | 1033(s)                                     |

\*Intensities are denoted as follows: vs-very strong, s-strong, m-medium, w-weak.

**Table S4** Experimental and calculated IR spectral data of complex 1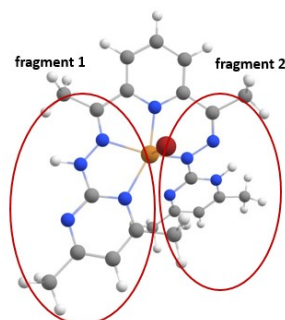

Optimized structure of complex 1

| Assignment                                                                                            | Calculated                  |                                  | Experimental                             |
|-------------------------------------------------------------------------------------------------------|-----------------------------|----------------------------------|------------------------------------------|
|                                                                                                       | Frequency, $\text{cm}^{-1}$ | Intensity, $\text{kM, mol}^{-1}$ | Frequency, $\text{cm}^{-1}$ (intensity*) |
| $\nu(\text{NH}_{\text{hydraz}})$                                                                      | 3449                        | 36                               | 3436(m)                                  |
| $\nu(\text{NH}_{\text{pyrim}})$                                                                       | 3398                        | 43                               | 3327(m)                                  |
| $\nu(\text{C}=\text{N}_{\text{azom}}-\text{NH}-)$ fragment 1                                          | 1642                        | 82                               | 1653(m)                                  |
| Pyrimid. ring, fragment 2                                                                             | 1614                        | 213                              | 1617(s)                                  |
| Py + Pyrimid. rings +<br>$\nu(\text{C}=\text{N}_{\text{azom}}-\text{N}=\text{C})_{\text{fragment 2}}$ | 1597<br>1594<br>1579        | 544<br>490<br>972                | 1593 (s), 1544 (s)                       |
| Pyrimid. ring, fragment 1                                                                             | 1529                        | 152                              | 1525(s)                                  |
| Pyrimid. ring, fragment 1 +<br>$\nu(\text{C}-\text{NH}_{\text{hydraz}})$                              | 1498                        | 72                               | 1481(m)                                  |
| $\delta(\text{CH, arom}), \delta(\text{CH}_3)$                                                        | 1445, 1446                  | 161, 46                          | 1474(m), 1455 (s)                        |

\*Intensities are denoted as follows: s-strong, m-medium, w-weak

**Table S5** Experimental and calculated IR spectral data of complex 2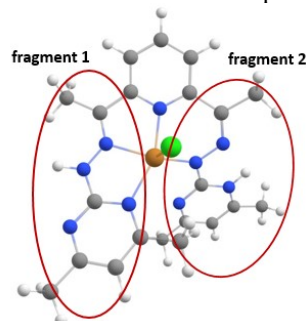

Optimized structure of complex 2

| Assignment                                                                                            | Calculated                  |                                  | Experimental                             |
|-------------------------------------------------------------------------------------------------------|-----------------------------|----------------------------------|------------------------------------------|
|                                                                                                       | Frequency, $\text{cm}^{-1}$ | Intensity, $\text{kM, mol}^{-1}$ | Frequency, $\text{cm}^{-1}$ (intensity*) |
| $\nu(\text{NH}_{\text{hydraz}})$                                                                      | 3453                        | 38                               | 3416(m)                                  |
| $\nu(\text{NH}_{\text{pyrimid}})$                                                                     | 3398                        | 62                               | 3262(m)                                  |
| $\nu(\text{C}=\text{N}_{\text{azom}}-\text{NH}-)$ fragment 1                                          | 1641                        | 81                               | 1655(m)                                  |
| Pyrimid. ring, fragment 2                                                                             | 1613                        | 218                              | 1638(m)                                  |
| Py + Pyrimid. rings +<br>$\nu(\text{C}=\text{N}_{\text{azom}}-\text{N}=\text{C})_{\text{fragment 2}}$ | 1598<br>1595<br>1579        | 526<br>506<br>895                | 1597 (s), 1547 (vs)                      |
| Pyrimid. ring, fragment 1                                                                             | 1529                        | 156                              | 1524(s)                                  |
| $\delta(\text{CH, arom}), \delta(\text{CH}_3)$                                                        | 1446, 1404                  | 59, 141                          | 1437(s), 1408(m)                         |
| Pyrimid. ring, fragment 1 +<br>$\nu(\text{C}-\text{NH}_{\text{hydraz}})$                              | 1338                        | 126                              | 1345(s)                                  |

\*Intensities are denoted as follows: vs – very strong, s-strong, m-medium, w-weak

**Table S6.** Experimental and calculated IR spectral data of complex **3**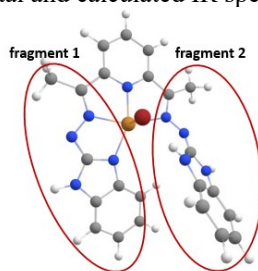Optimized cation structure of complex **3**

| Assignment                                                                          | Calculated                  |                               | Experimental<br>Frequency, cm <sup>-1</sup><br>(intensity*) |
|-------------------------------------------------------------------------------------|-----------------------------|-------------------------------|-------------------------------------------------------------|
|                                                                                     | Frequency, cm <sup>-1</sup> | Intensity, kmol <sup>-1</sup> |                                                             |
| $\nu(\text{NH})_{\text{benzimid, fragment 2}}$                                      | 3555                        | 75                            | 3437(w)                                                     |
| $\nu(\text{NH})_{\text{benzimid, fragment 1}}$                                      | 3549                        | 88                            | 3136(w)                                                     |
| $\nu(\text{NH})_{\text{hydrazon}\cdots\text{Br}}$                                   | 2973                        | 855                           | 2906 (m)                                                    |
| $\nu(\text{N}=\text{C}_{\text{benzimid}})_{\text{fragment 2}} + \text{Benzim ring}$ | 1623                        | 928                           | 1658(m)                                                     |
| Benzim ring, fragment 2                                                             | 1612                        | 13                            | 1622(m)                                                     |
| Benzim ring, fragment 1                                                             | 1609                        | 30                            | 1604(m)                                                     |
| Py ring                                                                             | 1581                        | 74                            | 1575(s)                                                     |
| $\nu(\text{C}=\text{N})_{\text{azom, fragment 1}} + \text{Py ring}$                 | 1566                        | 111                           | 1535(m)                                                     |
| $\nu(\text{C}=\text{N})_{\text{azom, fragment 2}} + \text{Py ring}$                 | 1548                        | 129                           |                                                             |
| $\nu(\text{N}=\text{C}_{\text{benzimid}})_{\text{fragment 1}} + \text{Benzim ring}$ | 1512                        | 823                           | 1517(m)                                                     |
| Py + Benzim rings                                                                   | 1478                        | 109                           | 1473(m)                                                     |
| $\delta(\text{CH}_{\text{arom}}), \delta(\text{CH}_3)$                              | 1462, 1459, 1427            | 108, 113, 121                 | 1458 (s)                                                    |
| $\nu(\text{C}=\text{N})_{\text{benzimid, fragment 1}} + \text{Py ring}$             | 1401                        | 314                           | 1359(m)                                                     |
| $\nu(\text{C}=\text{N})_{\text{benzimid, fragment 2}} + \text{Py ring}$             | 1377                        | 118                           |                                                             |
| $\nu(\text{N}=\text{N})$                                                            | 1233                        | 379                           | 1278(m)                                                     |

\*Intensities are denoted as follows: vs-very strong, s-strong, m-medium, w-weak.

**Table S7.** Experimental and calculated IR spectral data of complex **4**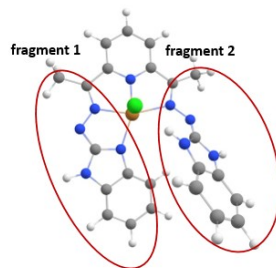Optimized cation structure of complex **4**

| Assignment                                                                          | Calculated                  |                               | Experimental<br>Frequency, cm <sup>-1</sup><br>(intensity*) |
|-------------------------------------------------------------------------------------|-----------------------------|-------------------------------|-------------------------------------------------------------|
|                                                                                     | Frequency, cm <sup>-1</sup> | Intensity, kmol <sup>-1</sup> |                                                             |
| $\nu(\text{NH})_{\text{benzimid, fragment 2}}$                                      | 3555                        | 74                            | 3314(w)                                                     |
| $\nu(\text{NH})_{\text{benzimid, fragment 1}}$                                      | 3549                        | 88                            | 3144 (w)                                                    |
| $\nu(\text{NH})_{\text{hydrazon}\cdots\text{Cl}}$                                   | 2909                        | 887                           | 2915 (m)                                                    |
| $\nu(\text{N}=\text{C}_{\text{benzimid}})_{\text{fragment 2}} + \text{Benzim ring}$ | 1623                        | 904                           | 1659(m)                                                     |
| Benzim ring, fragment 2                                                             | 1612                        | 10                            | 1632(m)                                                     |
| Benzim ring, fragment 1                                                             | 1609                        | 27                            | 1609(m)                                                     |
| Py ring                                                                             | 1581                        | 74                            | 1592(m)                                                     |
| $\nu(\text{C}=\text{N})_{\text{azom, fragment 1}} + \text{Py ring}$                 | 1566                        | 126                           | 1562(m)                                                     |
| $\nu(\text{C}=\text{N})_{\text{azom, fragment 2}} + \text{Py ring}$                 | 1549                        | 132                           |                                                             |
| $\nu(\text{N}=\text{C}_{\text{benzimid}})_{\text{fragment 1}} + \text{Benzim ring}$ | 1513                        | 833                           | 1526(m)                                                     |
| Py + Benzim rings                                                                   | 1478                        | 118                           | 1474(m)                                                     |
| $\delta(\text{CH}_{\text{arom}}), \delta(\text{CH}_3)$                              | 1462, 1459, 1427            | 108, 129, 121                 | 1456 (s)                                                    |
| $\nu(\text{C}=\text{N})_{\text{benzimid, fragment 1}} + \text{Py ring}$             | 1402                        | 327                           | 1361(m)                                                     |
| $\nu(\text{C}=\text{N})_{\text{benzimid, fragment 2}} + \text{Py ring}$             | 1380                        | 115                           |                                                             |
| $\nu(\text{N}=\text{N})$                                                            | 1234                        | 389                           | 1260(m)                                                     |

\*Intensities are denoted as follows: vs-very strong, s-strong, m-medium, w-weak.

**Table S8.** Experimental and calculated IR spectral data of complex **5**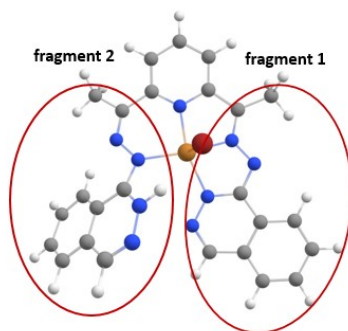Optimized cation structure of complex **5**

| Assignment                                                                           | Calculated                  |                                 | Experimental<br>Frequency, $\text{cm}^{-1}$<br>(intensity*) |
|--------------------------------------------------------------------------------------|-----------------------------|---------------------------------|-------------------------------------------------------------|
|                                                                                      | Frequency, $\text{cm}^{-1}$ | Intensity, $\text{kM mol}^{-1}$ |                                                             |
| $\nu(\text{CH})$                                                                     | 3087                        | 32                              | 3194(w), 3142(w),                                           |
|                                                                                      | 3082                        | 47                              |                                                             |
|                                                                                      | 3074                        | 24                              |                                                             |
| $\nu(\text{CH}_3)$                                                                   | 3069                        | 22                              | 3050(w)                                                     |
|                                                                                      | 3036                        | 10                              |                                                             |
|                                                                                      | 2968                        | 18                              |                                                             |
| $\nu(\text{NH}\dots\text{Br})$                                                       | 2794                        | 1297                            | 2707(w)                                                     |
| Phtal. ring, fragment 2                                                              | 1616                        | 175                             | 1585(s)                                                     |
|                                                                                      | 1598                        | 28                              |                                                             |
| $\nu(\text{C}=\text{N}_{\text{azom}})+\text{Py}+\text{Phtal. rings}$                 | 1575                        | 30                              | 1545 (m), 1510(s)                                           |
|                                                                                      | 1572                        | 97                              |                                                             |
|                                                                                      | 1567                        | 66                              |                                                             |
| Phtal. ring, fragment 1                                                              | 1472                        | 104                             | 1478(m)                                                     |
| $\nu(\text{C}=\text{N}_{\text{pyridine}})+\delta(\text{CH}_3)$                       | 1447                        | 38                              | 1464(m)                                                     |
| Phtal. ring, fragment 2                                                              | 1426                        | 60                              | 1408(m)                                                     |
| $\nu(\text{N}=\text{C})_{\text{fragment 1}}+\nu(\text{C}=\text{N})_{\text{Phtal 1}}$ | 1419                        | 67                              | 1375(s)                                                     |
| $\nu(\text{N}=\text{C})_{\text{fragment 2}}+\delta(\text{CH}_3)$                     | 1390                        | 381                             | 1360(m)                                                     |
| $\delta(\text{CH}_{\text{arom}}), \delta(\text{CH}_3)$                               | 1373, 1360                  | 208, 207                        | 1326(m)                                                     |
| $\nu(\text{C}-\text{NH})_{\text{Phtal 2}}$                                           | 1330                        | 213                             | 1308(m)                                                     |
| $\nu(\text{N}=\text{N})$                                                             | 1273                        | 228                             | 1255(m)                                                     |

\*Intensities are denoted as follows: vs-very strong, s-strong, m-medium, w-weak.

**Table S9.** Experimental and calculated IR spectral data of complex **6**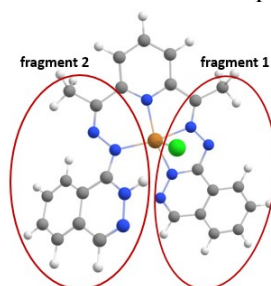Optimized cation structure of complex **6**

| Assignment                     | Calculated                  |                                 | Experimental<br>Frequency, $\text{cm}^{-1}$<br>(intensity*) |
|--------------------------------|-----------------------------|---------------------------------|-------------------------------------------------------------|
|                                | Frequency, $\text{cm}^{-1}$ | Intensity, $\text{kM mol}^{-1}$ |                                                             |
| $\nu(\text{CH})$               | 3087                        | 32                              | 3150(w), 3060 (w)                                           |
|                                | 3082                        | 47                              |                                                             |
|                                | 3074                        | 24                              |                                                             |
| $\nu(\text{CH}_3)$             | 3069                        | 22                              | 3044 (w), 2982 (w)                                          |
|                                | 3036                        | 10                              |                                                             |
|                                | 2968                        | 18                              |                                                             |
| $\nu(\text{NH}\dots\text{Cl})$ | 2794                        | 1297                            | 2890(w)                                                     |
| Phtal. ring, fragment 2        | 1616                        | 175                             | 1590(s)                                                     |
|                                | 1598                        | 28                              |                                                             |

|                                                                                      |                      |                |                    |
|--------------------------------------------------------------------------------------|----------------------|----------------|--------------------|
| $\nu(\text{C}=\text{N}_{\text{azom}})+\text{Py}+\text{Phtal. rings}$                 | 1575<br>1572<br>1567 | 30<br>97<br>66 | 1532 (m), 1517 (m) |
| Phtal. ring, fragment 1                                                              | 1472                 | 104            | 1466(s)            |
| $\nu(\text{C}=\text{N}_{\text{pyridine}})+\delta(\text{CH}_3)$                       | 1447                 | 38             | 1454(m)            |
| Phtal. ring, fragment 1                                                              | 1426                 | 60             | 1416(m)            |
| $\nu(\text{N}=\text{C})_{\text{fragment 1}}+\nu(\text{C}=\text{N})_{\text{Phtal 1}}$ | 1419                 | 67             | 1370(m)            |
| $\nu(\text{N}=\text{C})_{\text{fragment 2}}+\delta(\text{CH}_3)$                     | 1390                 | 381            | 1349(m)            |
| $\delta(\text{CH}_{\text{arom}}), \delta(\text{CH}_3)$                               | 1373, 1360           | 208, 207       | 1338(m)            |
| $\nu(\text{C}-\text{NH})_{\text{Phtal 2}}$                                           | 1330                 | 213            | 1315(m)            |
| $\nu(\text{N}=\text{N})$                                                             | 1273                 | 228            | 1252(m)            |

\*Intensities are denoted as follows: vs-very strong, s-strong, m-medium, w-weak.

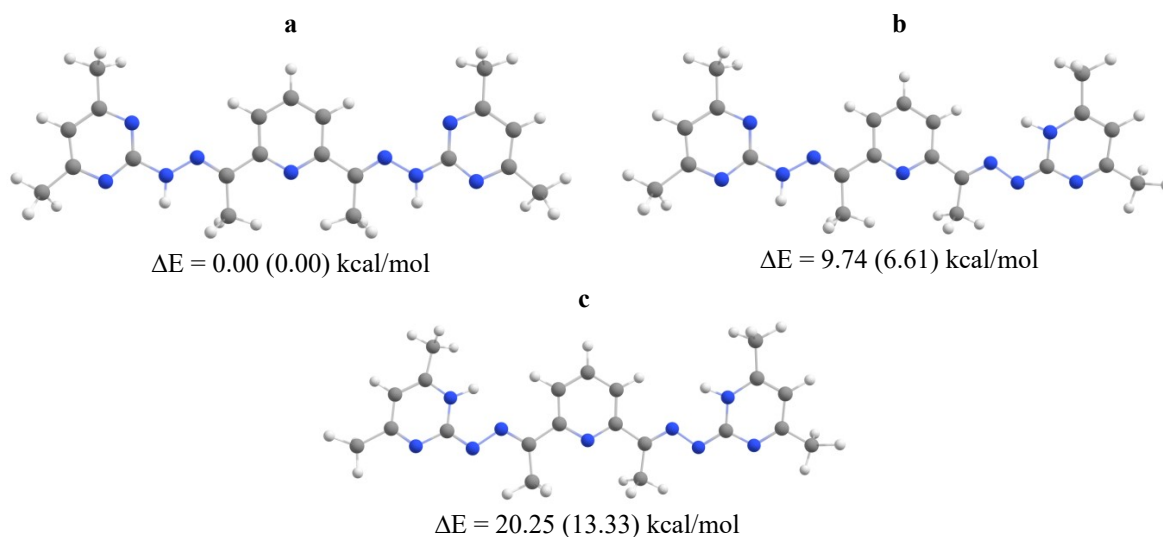

**Figure S1** Optimized structures and relative energies of the selected most stable tautomeric forms of  $\text{H}_2\text{L}^1$  in the gas phase and DMSO solution (value in parenthesis – for DMSO solution)

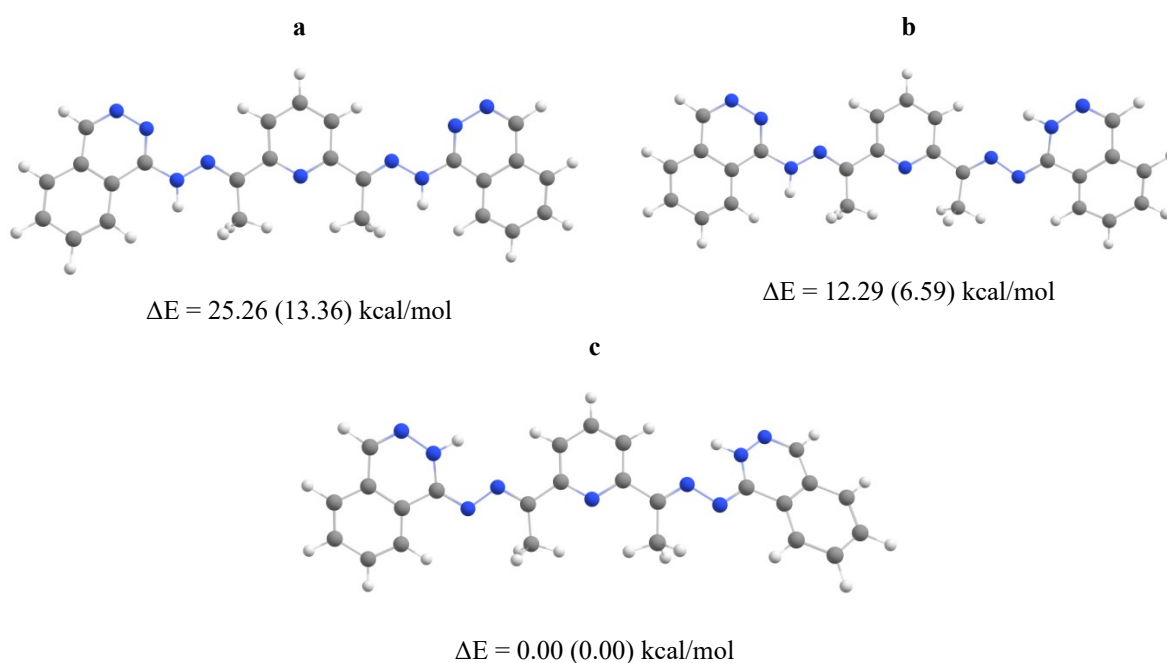

**Figure S2** Optimized structures and relative energies of the selected most stable tautomeric forms of  $\text{H}_2\text{L}^3$  in the gas phase and DMSO solution (value in parenthesis – for DMSO solution)

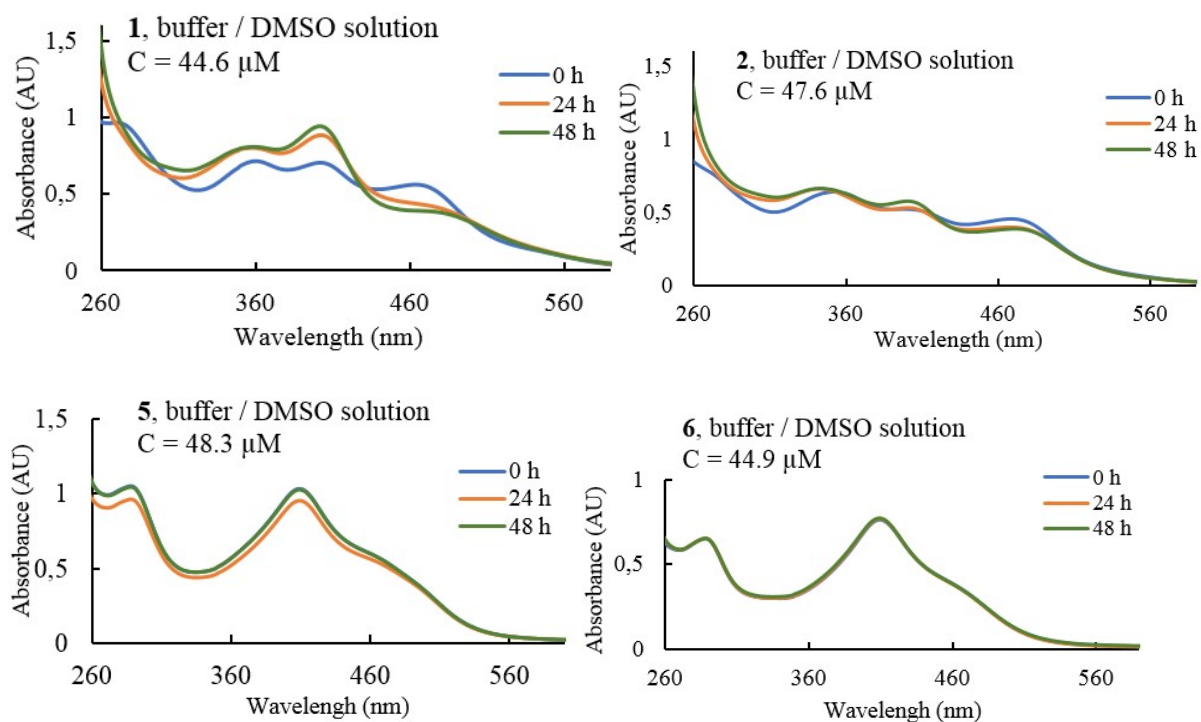

**Figure S3** Evolution of the UV-vis absorption spectra of the complexes **1**, **2**, **5** and **6** in phosphate buffer saline – DMSO solution (1:40 by volume) at  $t = 0, 24, 48$  h.

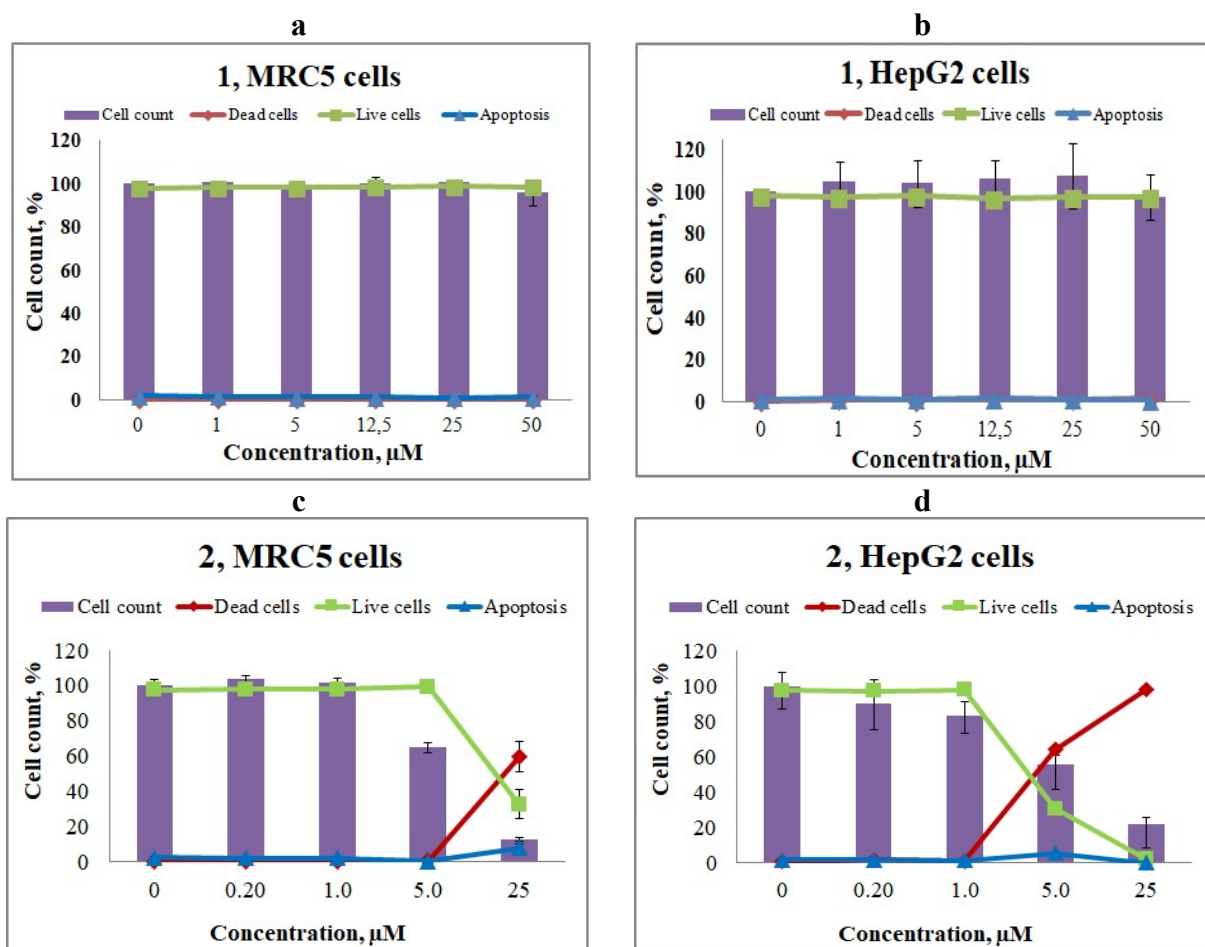

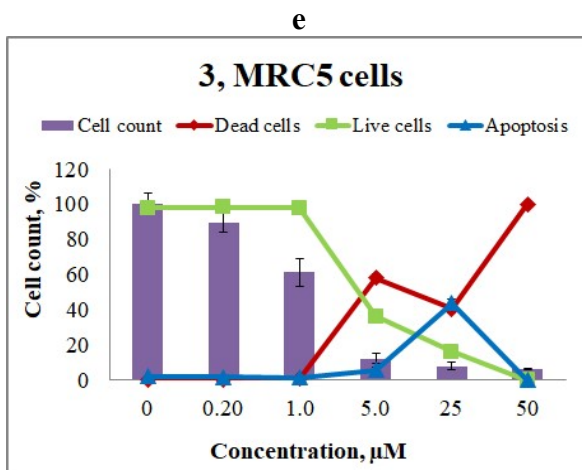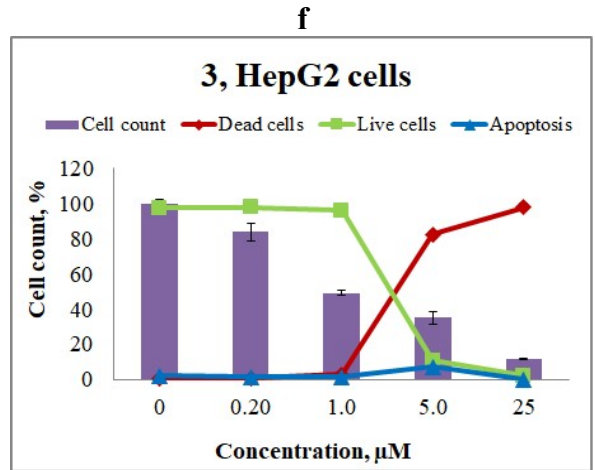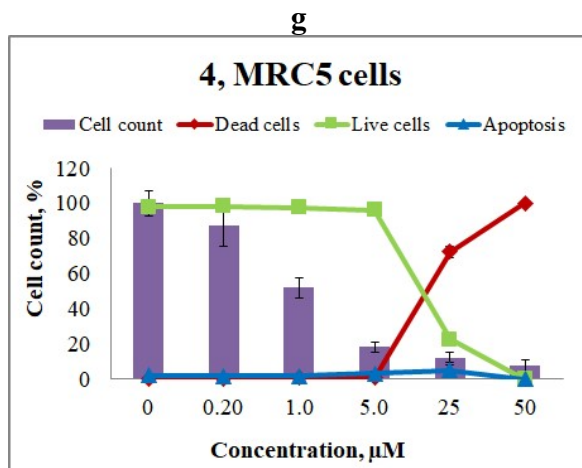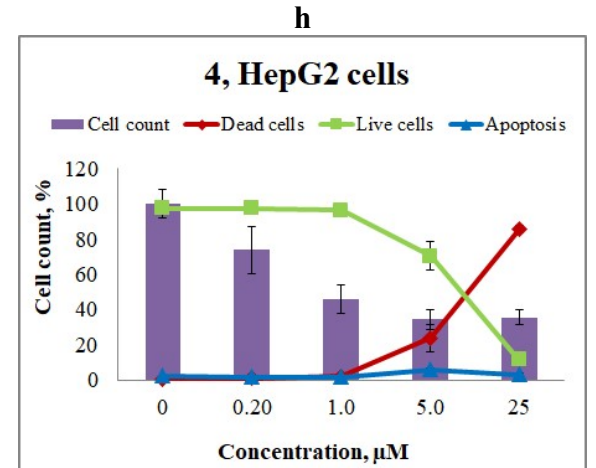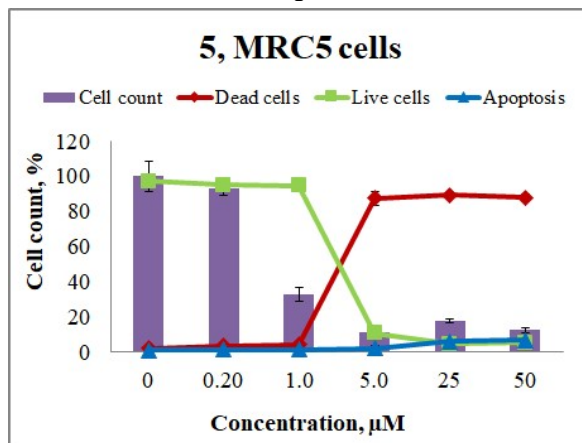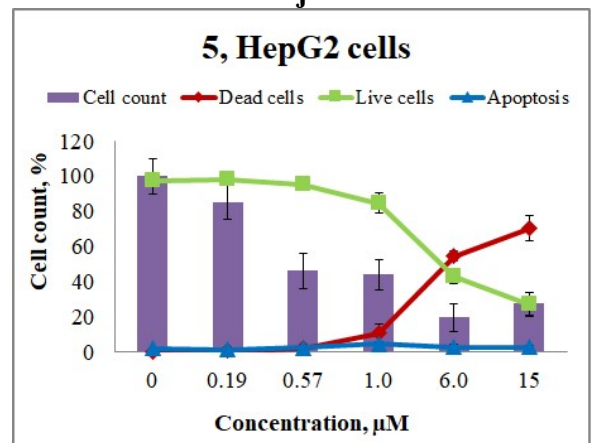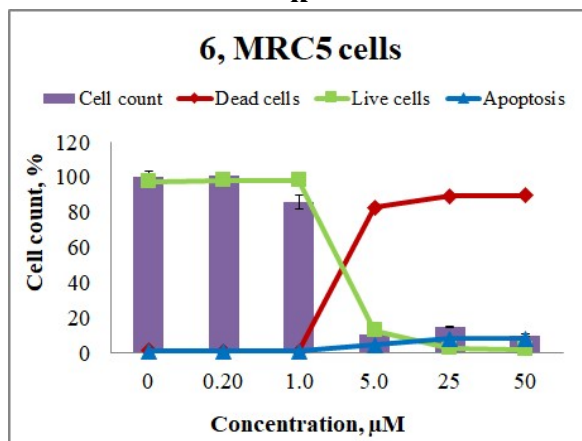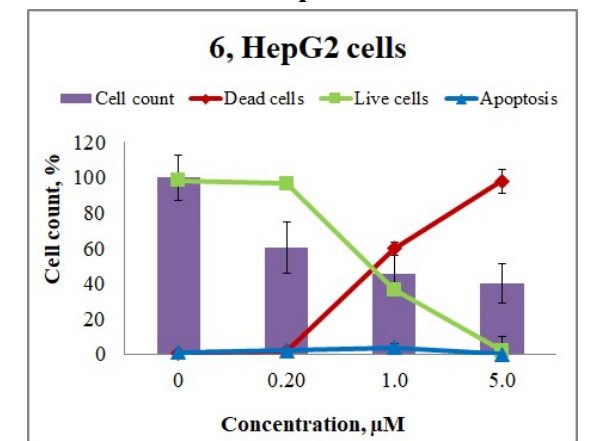



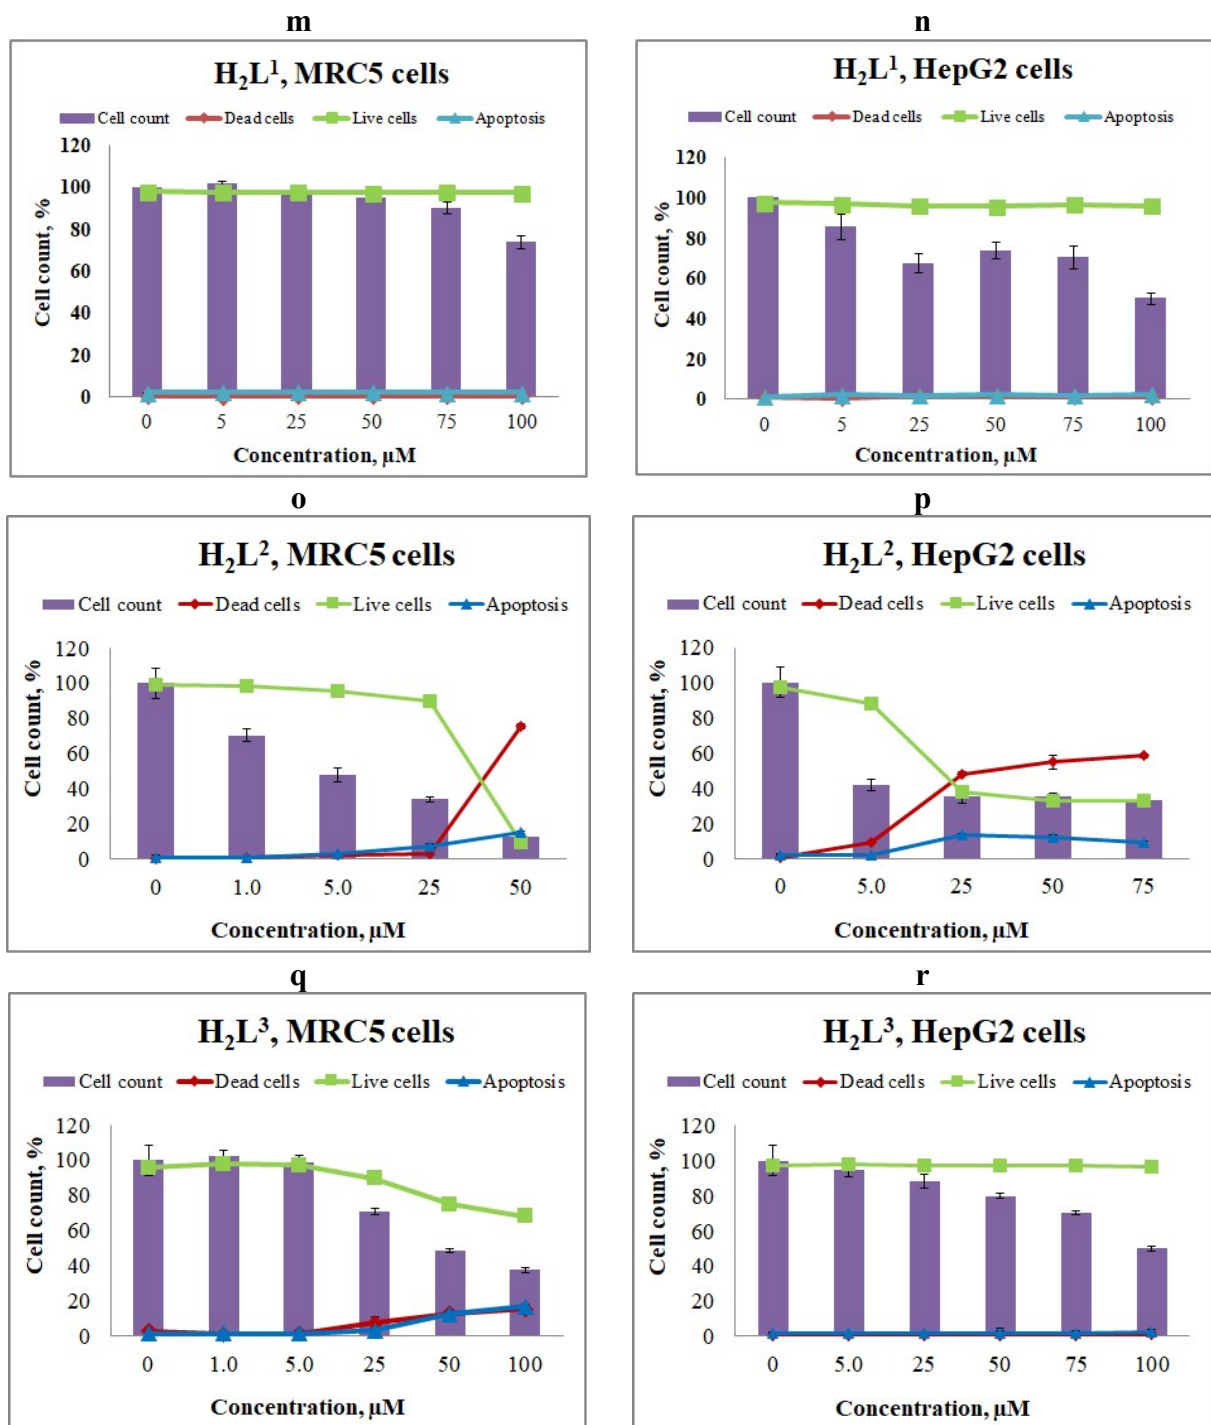

Fig. S4. Effect of 1-6 and ligands on the viability of HepG2 and MRC-5 cells determined by dual staining with Hoechst 33342/propidium iodide.
